# Supplementary material for: Ultrastructural Variations of Antennae and Labia Are Associated with Feeding Habit Shifts in Stink Bugs (Heteroptera: Pentatomidae)
Source: MDPI journal article supplement (doi:10.3390/biology10111161), 2021-11-10
Supplement: s1 [file s1]

# Supplementary Materials

## Supplementary Figure S1

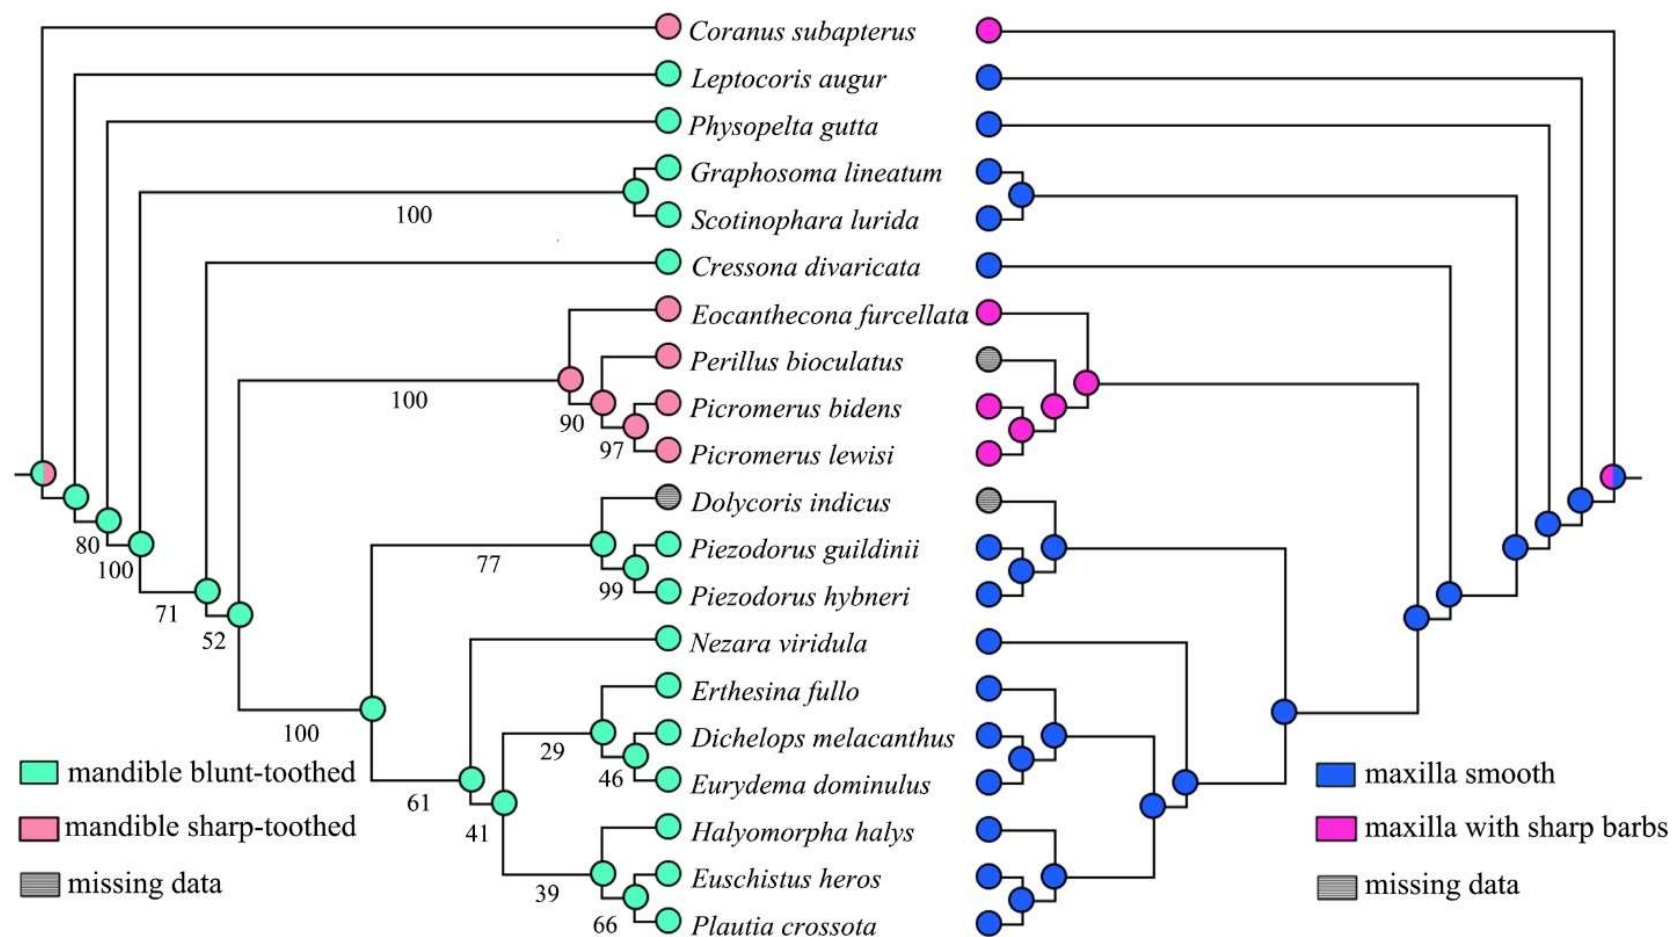

**Figure S1.** Ancestral state reconstruction of the shape of mandibles (left) and maxillae (right) in Pentatomidae based on parsimony. The cladogram used for reconstruction was the single tree obtained based on *cox1* and *rrnL* genes. The numbers under the branches are bootstrap values.

**Table S1–S11**

**Table S1.** Information of taxonomy, feeding habits, morphological references and genes *cox1* and *rrnL* accession numbers of all the species sampled in present study.

| Family                      | Subfamily                         | Species                                          | Feeding habit | Morphological reference | GenBank accession number<br><i>cox1</i>              | <i>rrnL</i> |
|-----------------------------|-----------------------------------|--------------------------------------------------|---------------|-------------------------|------------------------------------------------------|-------------|
| Largidae Amyot & Serville   | -                                 | <i>Physopelta gutta</i> (Burmeister, 1834)[1]    | Phytophagous  | [2]                     | EU427343.1                                           | EU427343.1  |
| Reduviidae Latreille        | Harpactorinae Amyot & Serville    | <i>Coranus subapterus</i> (De Geer, 1773)[3]     | Predatory     | [4]                     | KM022149.1                                           | -           |
| Rhopalidae Amyot & Serville | -                                 | <i>Leptocoris augur</i> (Fabricius, 1781)[5]     | Phytophagous  | [6]                     | KX503052.1                                           | KX523378.1  |
| Pentatomidae Leach          | Phyllocephalinae Amyot & Serville | <i>Cressona divaricata</i> Zheng & Zou, 1982*[7] | Phytophagous  | present study           | MK363262.1<br>KP142936.1<br>MZ673416                 | MZ676042    |
|                             |                                   | <i>Eocanthecona furcellata</i> (Wolff, 1811)[8]  | Predatory     | present study           | MK393432.1                                           | -           |
|                             |                                   | <i>Perillus bioculatus</i> (Fabricius, 1775)[9]  | Predatory     | [4,10,11]               | MG398669.1                                           | -           |
|                             | Asopinae Amyot & Serville         | <i>Picromerus bidens</i> (Linnaeus, 1758)[12]    | Predatory     | [13]                    | KJ541616.1                                           | MT265462.1  |
|                             |                                   | <i>Picromerus lewisi</i> Scott, 1874[14]         | Predatory     | [13]                    | KY710772.1                                           | KC155950.1  |
|                             |                                   | <i>Dichelops melacanthus</i> Dallas, 1851[15]    | Phytophagous  | [16]                    | JQ218483.1<br>JQ218506.1<br>MN257052.1<br>JQ218458.1 | KC537022.1  |
|                             |                                   | <i>Dolycoris indicus</i> Stål, 1876[17]          | Phytophagous  | [10,11]                 | KX467344.1                                           | -           |
|                             | Pentatominae Leach                | <i>Erthesina fullo</i> (Thunberg, 1783)[18]      | Phytophagous  | [19]                    | MK374364.1                                           | MK374364.1  |
|                             |                                   | <i>Eurydema dominulus</i> (Scopoli, 1763)[20]    | Phytophagous  | present study           | MG584833.1                                           | MG584833.1  |
|                             |                                   | <i>Euschistus heros</i> (Fabricius, 1798)[21]    | Phytophagous  | [16,22]                 | MN257053.1<br>KU892543.1                             | KU853769.1  |

|                            |                                                  |              |               |             |             |
|----------------------------|--------------------------------------------------|--------------|---------------|-------------|-------------|
| Podopinae Amyot & Serville | <i>Halyomorpha halys</i> (Stål, 1855)[23]        | Phytophagous | present study | NC_013272.1 | NC_013272.1 |
|                            | <i>Nezara viridula</i> (Linnaeus, 1758)[12]      | Phytophagous | [16,24,25]    | NC_011755.1 | NC_011755.1 |
|                            | <i>Piezodorus guildinii</i> (Westwood, 1837)[26] | Phytophagous | [16,22]       | HQ985132.1  | JX425407.1  |
|                            |                                                  |              |               | JX425420.1  |             |
|                            |                                                  |              |               | JQ218490.1  |             |
|                            |                                                  |              |               | JQ218510.1  |             |
|                            | <i>Piezodorus hybneri</i> (Gmelin, 1790)[27]     | Phytophagous | [10,16]       | KX467346.1  | -           |
|                            | <i>Plautia crossota</i> (Dallas, 1851)[15]       | Phytophagous | present study | MK757497.1  | MK757497.1  |
|                            | <i>Graphosoma lineatum</i> (Linnaeus, 1758) [12] | Phytophagous | [4]           | KM021441.1  | -           |
|                            |                                                  |              |               | KX960066.1  |             |
|                            | <i>Scotinophara lurida</i> (Burmeister, 1834)[1] | Phytophagous | present study | MF497733.1  | MF497733.1  |

\* Fragments of *coxI* and *rrnL* sequenced in present study.

**Table S2.** Taxonomic and collecting information of the stink bug species examined in present study.

| Subfamily                         | Species                                       | Locality                                                   | Date         |
|-----------------------------------|-----------------------------------------------|------------------------------------------------------------|--------------|
| Phyllocephalinae Amyot & Serville | <i>Cressona divaricata</i> Zheng & Zou, 1982  | Qimaba, Honghe, Yunan, China                               | 2012-V-20    |
| Asopinae Amyot & Serville         | <i>Eocanthecona furcellata</i> (Wolff, 1811)  | Wenshan, Yunan, China                                      | 2020-VII-27  |
| Pentatominae Leach                | <i>Eurydema dominulus</i> (Scopoli, 1763)     | Qifang Town, Xiangyang, Hubei, China                       | 2018-VI-14   |
|                                   | <i>Halyomorpha halys</i> (Stål, 1855)         | Haidian, Beijing, China                                    | 2018-X-23    |
|                                   | <i>Plautia crossota</i> (Dallas, 1851)        | Tangfu County, HongKong, China                             | 2019-V-12    |
|                                   |                                               |                                                            |              |
| Podopinae Amyot & Serville        | <i>Scotinophara lurida</i> (Burmeister, 1834) | Fengtongzhai National Nature Reserve, Yaan, Sichuan, China | 2018-VIII-29 |

**Table S3.** Host plant information of the stink bug species sampled in present study.

| Subfamily                         | Species                                      | Host plant family* |
|-----------------------------------|----------------------------------------------|--------------------|
| Phyllocephalinae Amyot & Serville | <i>Cressona divaricata</i> Zheng & Zou, 1982 | Poaceae            |
|                                   | <i>Dichelops melacanthus</i> Dallas, 1851    | Fabaceae           |
| Pentatominae Leach                | <i>Dolycoris indicus</i> Stål, 1876          | Oleaceae           |
|                                   |                                              | Poaceae            |
|                                   |                                              | Apiaceae           |
|                                   |                                              | Asteraceae         |
|                                   |                                              | Brassicaceae       |
|                                   |                                              | Cannabaceae        |
|                                   |                                              | Chenopodiaceae     |
|                                   |                                              | Cuscutaceae        |
|                                   |                                              | Fabaceae           |
|                                   |                                              | Liliaceae          |
|                                   |                                              | Linaceae           |
|                                   |                                              | Malvaceae          |
|                                   |                                              | Plantaginaceae     |
|                                   |                                              | Poaceae            |
|                                   |                                              | Polygonaceae       |
|                                   | <i>Erthesina fullo</i> (Thunberg, 1783)      | Santalaceae        |
|                                   |                                              | Solanaceae         |
|                                   |                                              | Anacardiaceae      |
|                                   |                                              | Apocynaceae        |
|                                   |                                              | Araliaceae         |
|                                   |                                              | Bignoniaceae       |
|                                   |                                              | Burseraceae        |
|                                   |                                              | Cannabinaceae      |
|                                   |                                              | Casuarinaceae      |
|                                   |                                              | Cupressaceae       |
|                                   |                                              | Ebenaceae          |
|                                   |                                              | Euphorbiaceae      |
|                                   |                                              | Fabaceae           |
|                                   |                                              | Hamamelidaceae     |
|                                   |                                              | Juglandaceae       |
|                                   |                                              | Lauraceae          |
|                                   |                                              | Magnoliaceae       |
|                                   |                                              | Malvaceae          |
|                                   |                                              | Meliaceae          |
|                                   |                                              | Mimosaceae         |
|                                   |                                              | Moraceae           |
|                                   |                                              | Myrtaceae          |
|                                   |                                              | Oxalidaceae        |
|                                   |                                              | Pinaceae           |
|                                   |                                              | Platanaceae        |
|                                   |                                              | Poaceae            |
|                                   |                                              | Proteaceae         |
|                                   |                                              | Punicaceae         |
|                                   |                                              | Rhamnaceae         |
|                                   |                                              | Rosaceae           |
|                                   |                                              | Rubiaceae          |
|                                   |                                              | Salicaceae         |
|                                   |                                              | Santalaceae        |
|                                   |                                              | Scrophulariaceae   |
|                                   |                                              | Simaroubaceae      |
|                                   |                                              | Ulmaceae           |
|                                   |                                              | Verbenaceae        |

|                                              |                  |
|----------------------------------------------|------------------|
| <i>Eurydema dominulus</i> (Scopoli, 1763)    | Apiaceae         |
|                                              | Balsaminaceae    |
|                                              | Brassicaceae     |
|                                              | Lamiaceae        |
|                                              | Scrophulariaceae |
| <i>Euschistus heros</i> (Fabricius, 1798)    | Brassicaceae     |
|                                              | Fabaceae         |
|                                              | Oleaceae         |
|                                              | Solanaceae       |
|                                              |                  |
| <i>Halyomorpha halys</i> (Stål, 1855)        | Amaranthaceae    |
|                                              | Basellaceae      |
|                                              | Ebanaceae        |
|                                              | Fabaceae         |
|                                              | Malvaceae        |
|                                              | Moraceae         |
|                                              | Oleaceae         |
|                                              | Rosaceae         |
|                                              | Rutaceae         |
|                                              | Solanaceae       |
|                                              | Vitaceae         |
|                                              |                  |
| <i>Nezara viridula</i> (Linnaeus, 1758)      | Amaranthaceae    |
|                                              | Anacardiaceae    |
|                                              | Apiaceae         |
|                                              | Aquifoliaceae    |
|                                              | Asteraceae       |
|                                              | Brassicaceae     |
|                                              | Cannabaceae      |
|                                              | Capparaceae      |
|                                              | Chenopodiaceae   |
|                                              | Cupressaceae     |
|                                              | Euphorbiaceae    |
|                                              | Fagaceae         |
|                                              | Lamiaceae        |
|                                              | Liliaceae        |
|                                              | Linaceae         |
|                                              | Malvaceae        |
|                                              | Meliaceae        |
|                                              | Mimosaceae       |
|                                              | Oleaceae         |
|                                              | Pedaliaceae      |
|                                              | Plantaginaceae   |
|                                              | Poaceae          |
|                                              | Polygonaceae     |
|                                              | Rosaceae         |
|                                              | Rutaceae         |
|                                              | Scrophulariaceae |
|                                              | Solanaceae       |
|                                              |                  |
| <i>Piezodorus guildinii</i> (Westwood, 1837) | Apiaceae         |
|                                              | Aquifoliaceae    |
|                                              | Brassicaceae     |
|                                              | Cucurbitaceae    |
|                                              | Fabaceae         |
|                                              | Linaceae         |
|                                              | Malpighiaceae    |
|                                              | Oleaceae         |
|                                              | Phytolaccaceae   |
|                                              | Rosaceae         |

|                            |                                               |                                                                                                                                                                                                                                                        |
|----------------------------|-----------------------------------------------|--------------------------------------------------------------------------------------------------------------------------------------------------------------------------------------------------------------------------------------------------------|
|                            | <i>Piezodorus hybneri</i> (Gmelin, 1790)      | Solanaceae<br>Anacardiaceae<br>Fabaceae<br>Poaceae<br>Verbenaceae                                                                                                                                                                                      |
|                            | <i>Plautia crossota</i> (Dallas, 1851)        | Anacardiaceae<br>Asteraceae<br>Basellaceae<br>Brassicaceae<br>Cannaceae<br>Caprifoliaceae<br>Convolvulaceae<br>Fabaceae<br>Moraceae<br>Poaceae<br>Rhamnaceae<br>Rubiaceae<br>Santalaceae<br>Scrophulariaceae<br>Solanaceae<br>Tiliaceae<br>Verbenaceae |
| Podopinae Amyot & Serville | <i>Graphosoma lineatum</i> (Linnaeus, 1758)   | Apiaceae<br>Asteraceae                                                                                                                                                                                                                                 |
|                            | <i>Scotinophara lurida</i> (Burmeister, 1834) | Cyperaceae<br>Marsileaceae<br>Poaceae<br>Pontederiaceae                                                                                                                                                                                                |

Information of host plant family was summarized from the online database Pentatomoidea Home Page, with the related literatures available on <https://www.ndsu.edu/pubweb/~rider/Pentatomoidea/>.

**Table S4.** Morphometric data of labial and antennal sensilla in *Cressona divaricata* Zheng & Zou, 1982.

| Sensilla type | Length (μm)   | Basal Diameter (μm) | Distribution          |
|---------------|---------------|---------------------|-----------------------|
| AnCh I        | 71.62 ± 11.88 | 6.37 ± 1.84         | Sc, BPd, DPd, Bf, Df. |
| AnTr I        | 58.67 ± 6.70  | 4.25 ± 0.66         | Bf, Df.               |
| AnTr II       | 44.80 ± 5.23  | 2.73 ± 0.45         | Bf, Df.               |
| AnBa I        | 15.28 ± 0.88  | 2.40 ± 0.26         | Bf, Df.               |

Data are mean ± SD values obtained from scanning electron microscopy based on about 20 antennal sensilla of each type selected from antennal scape to distiflagellomere of males and females. AnBa I, antennal sensilla basiconica I; AnCh I, antennal sensilla chaetica I; AnTr I–II, antennal sensilla trichodea I–II; Bf, basiflagellomere; BPd, basal pedicel; Df, distiflagellomere; DPd, distal pedicel; Sc, scape.

**Table S5.** Morphometric data of labial and antennal sensilla in *Eocanthecona furcellata* (Wolff, 1811).

| Sensilla type | Length (μm)  | Basal Diameter (μm) | Distribution          |
|---------------|--------------|---------------------|-----------------------|
| AnCh I        | 44.62 ± 2.50 | 4.16 ± 0.67         | Sc, BPd, DPd, Bf, Df. |
| AnCh II       | 43.18 ± 8.01 | 3.38 ± 0.69         | Sc, BPd.              |
| LaTr I        | 44.59 ± 8.21 | 2.14 ± 0.63         | La.                   |
| LaTr II       | 21.94 ± 2.79 | 3.16 ± 0.99         | La.                   |
| AnTr I        | 47.77 ± 2.93 | 3.43 ± 0.87         | DPd, Bf, Df.          |

|          |              |             |              |
|----------|--------------|-------------|--------------|
| AnTr II  | 37.67 ± 1.08 | 1.41 ± 0.15 | DPd, Bf, Df. |
| LaBa I   | 19.86 ± 1.22 | 3.14 ± 0.63 | La.          |
| LaBa II  | 7.07 ± 2.02  | 2.19 ± 0.24 | La.          |
| LaBa III | 22.15 ± 1.68 | 8.36 ± 1.91 | DPd, Bf, Df. |
| AnBa I   | 13.15 ± 2.75 | 1.93 ± 0.10 | DPd, Bf, Df. |
| AnCo I   | 2.37 ± 0.08  | 1.63 ± 0.05 | Df.          |
| AnCo II  | -            | 0.35 ± 0.06 | Df.          |

Data are mean ± SD values obtained from scanning electron microscopy based on about 20 antennal sensilla of each type selected from antennal scape to distiflagellomere of males and females. Antennal sensilla coeloconica I and II are tiny in size, few in number and sparsely scattered on distiflagellomere; therefore, their measurements were got from all the observed ones (around 3 to 5). AnBa I, antennal sensilla basiconica I; AnCh I–II, antennal sensilla chaetica I–II; AnCo I–II, antennal sensilla coeloconica I–II; AnTr I–II, antennal sensilla trichodea I–II; LaBa I–III, labial sensilla basiconica I–III; Bf, basiflagellomere; BPd, basal pedicel; Df, distiflagellomere; DPd, distal pedicel; LaBa I–III, labial sensilla basiconica I–III; LaTr I–II, labial sensilla trichodea I–II; Sc, scape.

**Table S6.** Morphometric data of labial and antennal sensilla in *Eurydema dominulus* (Scopoli, 1763).

| Sensilla type | Length (µm)  | Basal Diameter (µm) | Distribution          |
|---------------|--------------|---------------------|-----------------------|
| AnCh I        | 46.80 ± 5.50 | 4.22 ± 0.24         | Sc, BPd, DPd, Bf, Df. |
| LaTr I        | 44.01 ± 4.52 | 3.54 ± 0.12         | La.                   |
| LaTr II       | 23.01 ± 1.65 | 3.42 ± 0.30         | La.                   |
| AnTr I        | 34.40 ± 2.71 | 3.23 ± 0.43         | Bf, Df.               |
| AnTr II       | 32.36 ± 2.83 | 1.51 ± 0.29         | Bf, Df.               |
| LaBa I        | 11.97 ± 1.61 | 3.36 ± 0.14         | La.                   |
| LaBa II       | 6.93 ± 0.82  | 2.52 ± 0.30         | La.                   |
| AnBa I        | 10.87 ± 0.92 | 2.46 ± 0.30         | Bf, Df.               |

Data are mean ± SD values obtained from scanning electron microscopy based on about 20 antennal sensilla of each type selected from antennal scape to distiflagellomere of males and females. AnBa I, antennal sensilla basiconica I; AnCh I, antennal sensilla chaetica I; AnTr I–II, antennal sensilla trichodea I–II; Bf, basiflagellomere; BPd, basal pedicel; Df, distiflagellomere; DPd, distal pedicel; LaBa I–II, labial sensilla basiconica I–II; LaTr I–II, labial sensilla trichodea I–II; Sc, scape.

**Table S7.** Morphometric data of labial and antennal sensilla in *Halyomorpha halys* (Stål, 1855).

| Sensilla type | Length (µm)  | Basal Diameter (µm) | Distribution          |
|---------------|--------------|---------------------|-----------------------|
| AnCh I        | 52.12 ± 7.49 | 4.38 ± 0.62         | Sc, BPd, DPd, Bf, Df. |
| LaTr I        | 38.60 ± 9.17 | 2.85 ± 0.26         | La.                   |
| LaTr II       | 24.11 ± 9.36 | 2.49 ± 0.07         | La.                   |
| AnTr I        | 49.03 ± 5.40 | 3.51 ± 0.45         | BPd, DPd, Bf, Df.     |
| AnTr II       | 38.68 ± 2.28 | 1.74 ± 0.41         | BPd, DPd, Bf, Df.     |
| LaBa I        | 12.95 ± 2.80 | 3.59 ± 0.22         | La.                   |
| LaBa II       | 6.44 ± 1.70  | 2.95 ± 0.33         | La.                   |
| AnBa I        | 19.50 ± 1.09 | 2.30 ± 0.20         | DPd, Bf, Df.          |
| AnBa II       | 11.74 ± 1.08 | 2.48 ± 0.10         | DPd, Bf, Df.          |

|        |             |             |     |
|--------|-------------|-------------|-----|
| AnCo I | 3.71 ± 0.03 | 3.35 ± 0.20 | Df. |
|--------|-------------|-------------|-----|

Data are mean ± SD values obtained from scanning electron microscopy based on about 20 antennal sensilla of each type selected from antennal scape to distiflagellomere of males and females. Antennal sensilla coeloconica I are tiny in size, few in number and sparsely scattered on distiflagellomere; therefore, their measurements were got from all the observed ones (around 3 to 5). AnBa I–II, antennal sensilla basiconica I–II; AnCh I, antennal sensilla chaetica I; AnCo I, antennal sensilla coeloconica I; AnTr I–II, antennal sensilla trichodea I–II; Bf, basiflagellomere; BPd, basal pedicel; Df, distiflagellomere; DPd, distal pedicel; LaBa I–II, labial sensilla basiconica I–II; LaTr I–II, labial sensilla trichodea I–II; Sc, scape.

**Table S8.** Morphometric data of labial and antennal sensilla in *Plautia crossota* (Dallas, 1851).

| Sensilla type | Length (μm)  | Basal Diameter (μm) | Distribution          |
|---------------|--------------|---------------------|-----------------------|
| AnCh I        | 61.95 ± 6.17 | 4.16 ± 0.76         | Sc, BPd, DPd, Bf, Df. |
| LaTr I        | 56.28 ± 5.49 | 2.76 ± 0.23         | La.                   |
| LaTr II       | 20.47 ± 1.29 | 3.10 ± 0.60         | La.                   |
| AnTr I        | 41.75 ± 6.08 | 3.11 ± 0.12         | DPd, Bf, Df.          |
| AnTr II       | 35.98 ± 3.09 | 1.66 ± 0.26         | DPd, Bf, Df.          |
| LaBa I        | 14.37 ± 0.75 | 3.89 ± 0.22         | La.                   |
| LaBa II       | 10.96 ± 1.12 | 3.14 ± 0.23         | La.                   |
| AnBa I        | 17.51 ± 1.21 | 1.48 ± 0.15         | DPd, Bf, Df.          |
| AnBa II       | 11.65 ± 0.83 | 1.93 ± 0.30         | DPd, Bf, Df.          |
| AnCo I        | 2.07 ± 0.08  | 1.43 ± 0.09         | Df.                   |
| AnCo II       | -            | 0.54 ± 0.02         | Df.                   |

Data are mean ± SD values obtained from scanning electron microscopy based on about 20 antennal sensilla of each type selected from antennal scape to distiflagellomere of males and females. Antennal sensilla coeloconica I and II are tiny in size, few in number and sparsely scattered on distiflagellomere; therefore, their measurements were got from all the observed ones (around 3 to 5). AnBa I–II, antennal sensilla basiconica I–II; AnCh I, antennal sensilla chaetica I; AnCo I–II, antennal sensilla coeloconica I–II; AnTr I–II, antennal sensilla trichodea I–II; Bf, basiflagellomere; BPd, basal pedicel; Df, distiflagellomere; DPd, distal pedicel; LaBa I–II, labial sensilla basiconica I–II; LaTr I–II, labial sensilla trichodea I–II; Sc, scape.

**Table S9.** Morphometric data of labial and antennal sensilla in *Scotinophara lurida* (Burmeister, 1834).

| Sensilla type | Length (μm)  | Basal Diameter (μm) | Distribution          |
|---------------|--------------|---------------------|-----------------------|
| AnCh I        | 63.48 ± 4.63 | 3.17 ± 0.42         | Sc, BPd, DPd, Bf, Df. |
| AnTr I        | 67.85 ± 9.17 | 3.69 ± 0.63         | Bf, Df.               |
| AnTr II       | 43.81 ± 3.41 | 2.09 ± 0.54         | Bf, Df.               |
| AnBa I        | 17.59 ± 2.43 | 2.30 ± 0.40         | Bf, Df.               |
| AnCo II       | -            | 0.90 ± 0.09         | Df.                   |

Data are mean ± SD values obtained from scanning electron microscopy based on about 20 antennal sensilla of each type selected from antennal scape to distiflagellomere of males and females. Antennal sensilla coeloconica II are tiny in size, few in number and sparsely scattered on distiflagellomere; therefore, their measurements were got from all the observed ones (around 3 to 5). AnBa I, antennal sensilla basiconica I; AnCh I, antennal sensilla chaetica I; AnCo II, antennal sensilla coeloconica II; AnTr I–II, antennal sensilla trichodea I–II; Bf, basiflagellomere; BPd, basal pedicel; Df, distiflagellomere; DPd, distal pedicel; Sc, scape.



**Table S10.** Average density of basiconica sensilla on antennal distiflagellomere of the stink bug species examined in present study.

| Species                                       | Density (/10 <sup>4</sup> μm <sup>2</sup> ) |
|-----------------------------------------------|---------------------------------------------|
| <i>Cressona divaricata</i> Zheng & Zou, 1982  | 1.25 ± 0.32                                 |
| <i>Eocanthecona furcellata</i> (Wolff, 1811)  | 22.63 ± 7.48                                |
| <i>Eurydema dominulus</i> (Scopoli, 1763)     | 3.10 ± 1.67                                 |
| <i>Halyomorpha halys</i> (Stål, 1855)         | 5.10 ± 0.76                                 |
| <i>Plautia crossota</i> (Dallas, 1851)        | 7.74 ± 1.88                                 |
| <i>Scotinophara lurida</i> (Burmeister, 1834) | 5.59 ± 1.66                                 |

Data are mean ± SD values obtained from scanning electron microscopy. The densities were calculated by averaging the number of basiconica sensilla in two randomly selected 1000 μm<sup>3</sup> quadrats on the electron microscopic images from males and females.

**Table S11.** Morphological characters used for ancestral state reconstruction.

| Family                            | Subfamily                               | Species                                         | Mandible<br>(0: sharp-toothed; 1: blunt toothed) | Maxilla<br>(0: smooth; 1: with sharp barbs) | Reference                                                        |
|-----------------------------------|-----------------------------------------|-------------------------------------------------|--------------------------------------------------|---------------------------------------------|------------------------------------------------------------------|
| Largidae<br>Amyot &<br>Serville   | -                                       | <i>Physopelta gutta</i><br>(Burmeister, 1834)   | 0                                                | 0                                           | [2]                                                              |
| Reduviidae<br>Latreille           | Harpactorinae<br>Amyot &<br>Serville    | <i>Coranus subapterus</i> (De<br>Geer, 1773)    | 1                                                | 1                                           | [4]                                                              |
| Rhopalidae<br>Amyot &<br>Serville | -                                       | <i>Leptocoris augur</i><br>(Fabricius, 1781)    | 0                                                | 0                                           | [6]                                                              |
| Pentatomidae<br>Leach             | Phyllocephalinae<br>Amyot &<br>Serville | <i>Cressona divaricata</i><br>Zheng & Zou, 1982 | 0                                                | 0                                           | present study                                                    |
|                                   | Asopinae Amyot<br>& Serville            | <i>Eocanthecona furcellata</i><br>(Wolff, 1811) | 1                                                | 1                                           | present study                                                    |
|                                   |                                         | <i>Perillus bioculatus</i><br>(Fabricius, 1775) | 1                                                | ?                                           | [4]                                                              |
|                                   |                                         | <i>Picromerus bidens</i><br>(Linnaeus, 1758)    | 1                                                | 1                                           | [13]                                                             |
|                                   |                                         | <i>Picromerus lewisi</i> Scott,<br>1874         | 1                                                | 1                                           | [13]                                                             |
|                                   | Pentatominae<br>Leach                   | <i>Dichelops melacanthus</i><br>Dallas, 1851    | 0                                                | 0                                           | [16]                                                             |
|                                   |                                         | <i>Dolycoris indicus</i> Stål,<br>1876          | ?                                                | ?                                           | N.A. (with antennal<br>characters available<br>for this species) |

|                                                  |   |   |               |
|--------------------------------------------------|---|---|---------------|
| <i>Erthesina fullo</i><br>(Thunberg, 1783)       | 0 | 0 | [19]          |
| <i>Eurydema dominulus</i><br>(Scopoli, 1763)     | 0 | 0 | present study |
| <i>Euschistus heros</i><br>(Fabricius, 1798)     | 0 | 0 | [16]          |
| <i>Halyomorpha halys</i><br>(Stål, 1855)         | 0 | 0 | present study |
| <i>Nezara viridula</i><br>(Linnaeus, 1758)       | 0 | 0 | [16]          |
| <i>Piezodorus guildinii</i><br>(Westwood, 1837)  | 0 | 0 | [16]          |
| <i>Piezodorus hybneri</i><br>(Gmelin, 1790)      | 0 | 0 | [16]          |
| <i>Plautia crossota</i><br>(Dallas, 1851)        | 0 | 0 | present study |
| <i>Graphosoma lineatum</i><br>(Linnaeus, 1758)   | 0 | 0 | [4]           |
| <i>Scotinophara lurida</i><br>(Burmeister, 1834) | 0 | 0 | present study |

#### Reference

1. Burmeister, H. Rhyngota seu Hemiptera. In: Meyen, F.J.F Beiträge zur Zoologie, gesammelt auf einer Reise um die Erde, und W. Erichson's und H. Burmeister's Beschreibungen und Abbildungen der von Herrn Meyen auf dieser Reise gesammelten Insekten. *Nov. Acta Acad. Caesareae Leopoldino-Carolinae Naturae Curiosorum* **1834**, 16, 285–308.
2. Wang, Y.; Brożek, J.; Dai, W. Morphological disparity of the mouthparts in polyphagous species of Largidae (Heteroptera: Pentatomomorpha: Pyrrhocoroidea) reveals feeding specialization. *Insects* **2020**, *11*, 145, doi:10.3390/insects11030145.
3. De Geer, C. *Mémoires pour servir à l'histoire des insectes*; Pierre Hesselberg: Stockholm, 1773; Vol. 3, pp. 1–696.
4. Cobben, R.H. Evolutionary trends in Heteroptera. Part 2. Mouth part structures and feeding strategies. *Meded. Landbouwhoges. Wagening* **1978**, *78*, 5–407.
5. Fabricius, J.C. *Species insectorum exhibentes eorum differentias specificas, synonyma auctorum, loca natalia, metamorphosin adjectis observationibus, descriptionibus*; Bohnii: Hamburgi et Kilonii, 1781; p. 366.
6. Badwaik, V.; Barsagade, D. Distribution of sensilla and interlocking of mouthparts in red eye bug, *Leptocoris augur* (Hemiptera: Heteroptera: Rhopalidae). *Int. J. Res. Biosci. Agric. Technol.* **2014**, *2*, 193–207.
7. Zheng, L.Y.; Zou, H.G. Records of heteropterous insects on bamboo from Yunnan. *Zool. Res.* **1982**, *3*, 113–120.
8. Wolff, J.F. *Icones Cimicum descriptionibus illustratae*; Palm: Erlangen, 1811; Vol. 5, p. 182.
9. Fabricius, J.C. *Systema entomologiae sistens insectorum classes, ordines, genera, species; adjectis synonymis, locis, descriptionibus et observationibus*; Kortii: Flensburgi et Lipsiae, 1775; pp. 1–832.
10. Parveen, S.; Ahmad, A.; Broek, J.; Ramamurthy, V.V. Morphological diversity of the labial sensilla of phytophagous and predatory Pentatomidae (Hemiptera: Heteroptera), with reference to their possible functions. *Zootaxa* **2015**, *4039*, 359–372, doi:10.11646/zootaxa.4039.2.9.
11. Ahmad, A.; Parveen, S.; Brożek, J.; Dey, D. Antennal sensilla of phytophagous and predatory pentatomids

- (Hemiptera: Pentatomidae): a comparative study of four genera. *Zool. Anz.* **2016**, *261*, 48–55, doi:10.1016/j.jcz.2016.03.007.
12. Linnaeus, C. *Systema naturae per regna tria naturae: secundum classes, ordines, genera, species, cum characteribus, differentiis, synonymis, locis. Editio decima, reformata*; Salvii: Stockholm, 1758; pp. 442–444.
  13. Wang, Y.; Brožek, J.; Dai, W. Comparative morphology of the mouthparts in three predatory stink bugs (Heteroptera: Asopinae) reveals feeding specialization of stylets and sensilla. *Insects* **2020**, *11*, 1–23, doi:10.3390/insects11110762.
  14. Scott, J. On a collection of Hemiptera Heteroptera from Japan. Descriptions of various new genera and species. *Ann. Mag. Nat. Hist.* **1874**, *14*, 289–304.
  15. Dallas, W.S. *List of the specimens of hemipterous insects in the collection of the British Museum. Part I*; Trustees of the British Museum: London, 1851; pp. 1–368.
  16. Depieri, R.A.; Panizzi, A.R. Rostrum length, mandible serration, and food and salivary canals areas of selected species of stink bugs (Heteroptera, Pentatomidae). *Rev. Bras. Entomol.* **2010**, *54*, 584–587, doi:10.1590/S0085-56262010000400008.
  17. Stål, C. *Enumeratio hemipterorum: bidrag till en förteckning öfver alla hittills kända hemiptera, jemte systematiska meddelanden*; P. A. Norstedt: Stockholm, 1876; Vol. 14; p. 76.
  18. Thunberg, C.P. *Dissertatio entomologica novas insectorum species, sistens, cujus partem secundum*; Edman: Upsaliae, 1783; p. 42.
  19. Wang, Y.; Dai, W. How does the intricate mouthpart apparatus coordinate for feeding in the hemimetabolous insect pest *Erthesina fullo*? *Insects* **2020**, *11*, 1–24, doi:10.3390/insects11080503.
  20. Scopoli, J.A. *Entomologia carniolica exhibens Insecta Carnioliae indigena et distributa in ordines, genera, species, varietatis. Methodo Linnaeana*; Trattner: Vindobonae, 1763; p. 124.
  21. Fabricius, J.C. *Entomologia systematica emendata et aucta, secundum classes, ordines, genera, species, adjectis synonymis, locis, observationibus*; Proft et Storch: Hafniae, 1798; pp. 1–572.
  22. Silva, C.C.A.; de Capdeville, G.; Moraes, M.C.B.; Falcão, R.; Solino, L.F.; Laumann, R.A.; Silva, J.P.; Borges, M. Morphology, distribution and abundance of antennal sensilla in three stink bug species (Hemiptera: Pentatomidae). *Micron* **2010**, *41*, 289–300, doi:10.1016/j.micron.2009.11.009.
  23. Stål, C. *Öfversigt af Kongl. Vetenskaps-akademiens förhandlingar*; P. A. Norstedt & Söner: Stockholm, 1855; Vol. 12; p.182.
  24. Rani, P.U.; Madhavendra, S.S. Morphology and distribution of antennal sense organs and diversity of mouthpart structures in *Odontopus nigricornis* (Stål) and *Nezara viridula* L. (Hemiptera). *Int. J. Insect Morphol. Embryol.* **1995**, *24*, 119–132, doi:10.1016/0020-7322(94)00020-Q.
  25. Brézot, P.; Tauban, D.; Renou, M. Sense organs on the antennal flagellum of the green stink bug, *Nezara viridula* (L.) (Heteroptera: Pentatomidae) : sensillum types and numerical growth during the post-embryonic development. *Int. J. Insect Morphol. Embryol.* **1996**, *25*, 427–441, doi:10.1016/S0020-7322(96)00012-8.
  26. Westwood, J.O. *A catalogue of Hemiptera in the collection of the Rev. F. W. Hope, M. A. with short Latin diagnoses of the new species*; J. C. Bridgewater: London, 1837; p. 7.
  27. Gmelin, J.F. *Caroli a Linné Systema Naturae*; Beer: Lipsiae, 1790; p. 2151.
